# Supplementary material
Source: PubMed Central journal article supplement (PMC6134404)

## SUPPORTING INFORMATION

### Unveiling sequential late-stage methyltransferase reactions in the meleagrins/oxalins biosynthetic pathway

Sean A. Newmister<sup>†</sup>, Stelamar Romminger<sup>†</sup>, Jennifer J. Schmidt<sup>†</sup>, Robert M. Williams<sup>⊗</sup><sup>‡</sup>, Janet L. Smith<sup>†</sup><sup>§</sup>, Roberto G. S. Berlinck<sup>‡</sup>, David H. Sherman<sup>†</sup><sup>‡</sup><sup>¶</sup><sup>\*</sup>

<sup>†</sup>Life Sciences Institute, <sup>§</sup>Department of Biological Chemistry, <sup>‡</sup>Department of Medicinal Chemistry, <sup>¶</sup>Department of Chemistry, and <sup>#</sup>Department of Microbiology & Immunology, University of Michigan, Ann Arbor, Michigan, 48109, United States

<sup>⊗</sup>Department of Chemistry, Colorado State University, Fort Collins, Colorado 80523, United States

<sup>‡</sup>University of Colorado Cancer Center, Aurora, Colorado 80045, United States

<sup>‡</sup>Instituto de Química de São Carlos, Universidade de São Paulo, CP 780, CEP 13560-970 São Carlos, SP, Brazil

\*To whom correspondence should be addressed: davidhs@umich.edu

## Table of Contents

|                                                                                                |    |
|------------------------------------------------------------------------------------------------|----|
| Figure S1.....                                                                                 | 3  |
| Figure S2.....                                                                                 | 4  |
| Figure S3.....                                                                                 | 5  |
| Figure S4.....                                                                                 | 6  |
| Figure S5.....                                                                                 | 7  |
| Table S1.....                                                                                  | 8  |
| Table 2. NMR SPECTRA.....                                                                      | 9  |
| <sup>1</sup> H NMR spectrum of glandicoline C in MeOH- <i>d</i> <sub>4</sub> at 600 MHz.....   | 10 |
| <sup>13</sup> C NMR spectrum of glandicoline C in MeOH- <i>d</i> <sub>4</sub> at 125 MHz ..... | 11 |
| COSY NMR spectrum of glandicoline C in MeOH- <i>d</i> <sub>4</sub> .....                       | 12 |
| HSQC NMR spectrum of glandicoline C in MeOH- <i>d</i> <sub>4</sub> .....                       | 13 |
| HMBC spectrum of glandicoline C in MeOH- <i>d</i> <sub>4</sub> .....                           | 14 |
| <sup>1</sup> H NMR spectrum of glandicoline B in MeOH- <i>d</i> <sub>4</sub> at 600 MHz.....   | 15 |
| <sup>13</sup> C NMR spectrum of glandicoline B in MeOH- <i>d</i> <sub>4</sub> at 125 MHz ..... | 16 |
| COSY NMR spectrum of glandicoline B in MeOH- <i>d</i> <sub>4</sub> .....                       | 17 |
| HSQC NMR spectrum of glandicoline B in MeOH- <i>d</i> <sub>4</sub> .....                       | 18 |
| HMBC spectrum of glandicoline B in MeOH- <i>d</i> <sub>4</sub> .....                           | 19 |

**Figure S1.**

|             |            |                                                                          |            |
|-------------|------------|--------------------------------------------------------------------------|------------|
| <b>OxaG</b> | <b>1</b>   | <b>MTRATNFTELYAGKGILETYMIAEKITRYFTRDLIELSGLLESELSPLKLLDLACGTGVV</b>      | <b>60</b>  |
|             |            | MTRATNFTELYAGKGIL+TYM+AEKITRY+T+DLI+LSGL ES L+PL +LDLACGTGVV             |            |
| <b>RoqN</b> | <b>1</b>   | <b>MTRATNFTELYAGKGILD TYMVAEKITRYYTQDLIQLSGLSESSLTPLVILD LACGTGVV</b>    | <b>60</b>  |
| <b>OxaG</b> | <b>61</b>  | <b>SERLHEMLASKAPASWELICGDISAELTGHVKRKIIIEEGWTNSSARVMDAQNTE LATAEL</b>    | <b>120</b> |
|             |            | S+ LH+ML + +WEL CGDIS ELTGHVK+KI+E GW NS A+V+DAQNTE L T                  |            |
| <b>RoqN</b> | <b>61</b>  | <b>SDALHDMLNFQPKGNWELTCGDIS TELTGHVKQKILERGWENSI AKVVDAQNTE LPTGHY</b>   | <b>120</b> |
| <b>OxaG</b> | <b>121</b> | <b>THVFAALAWTSFPD TYAALKDSL RILRPGGTLTISTWQKTEWLG VLEAAVKTIPTRLPFP</b>   | <b>180</b> |
|             |            | THVFAALA+TSFPD TYAA+K+ +RIL+PGGTLTISTWQ+TEW L V+EAAV IP LPFP             |            |
| <b>RoqN</b> | <b>121</b> | <b>THVFAALAF TSFPD TYAAMKEVMRILQP GGTLTISTWQ RTEWLAVVEAAVAIIPADLPFP</b>  | <b>180</b> |
| <b>OxaG</b> | <b>181</b> | <b>TTKEFMSCMNP GWD DEN YVRGRLEEAGFVHVYSTTISKEFQISTADLYKIAAPV IPII VS</b> | <b>240</b> |
|             |            | TTKEFMSCMNP GWD E+YV R EEAGF V TTISK+F+ S DLYKIA PVIPII VS               |            |
| <b>RoqN</b> | <b>181</b> | <b>TTKEFMSCMNP GWDSE DYVHSRFEEAGFHSVQVTTI SKQFETSVEDLYKIAQPVIPII VS</b>  | <b>240</b> |
| <b>OxaG</b> | <b>241</b> | <b>KWWTTEQKEAHEHE I LPALAKHLEATYGETGLVPQKWTAVFAKGEK</b>                  | <b>286</b> |
|             |            | KWW EQ++ +E++ILPAL +HL TYGE GLVPQ+WTAVFA G+K                             |            |
| <b>RoqN</b> | <b>241</b> | <b>KWWNQEQRD KYEND I LPALQRHLNETYGENGLVPQEW TAVFATGQK</b>                | <b>286</b> |

Figure S2.

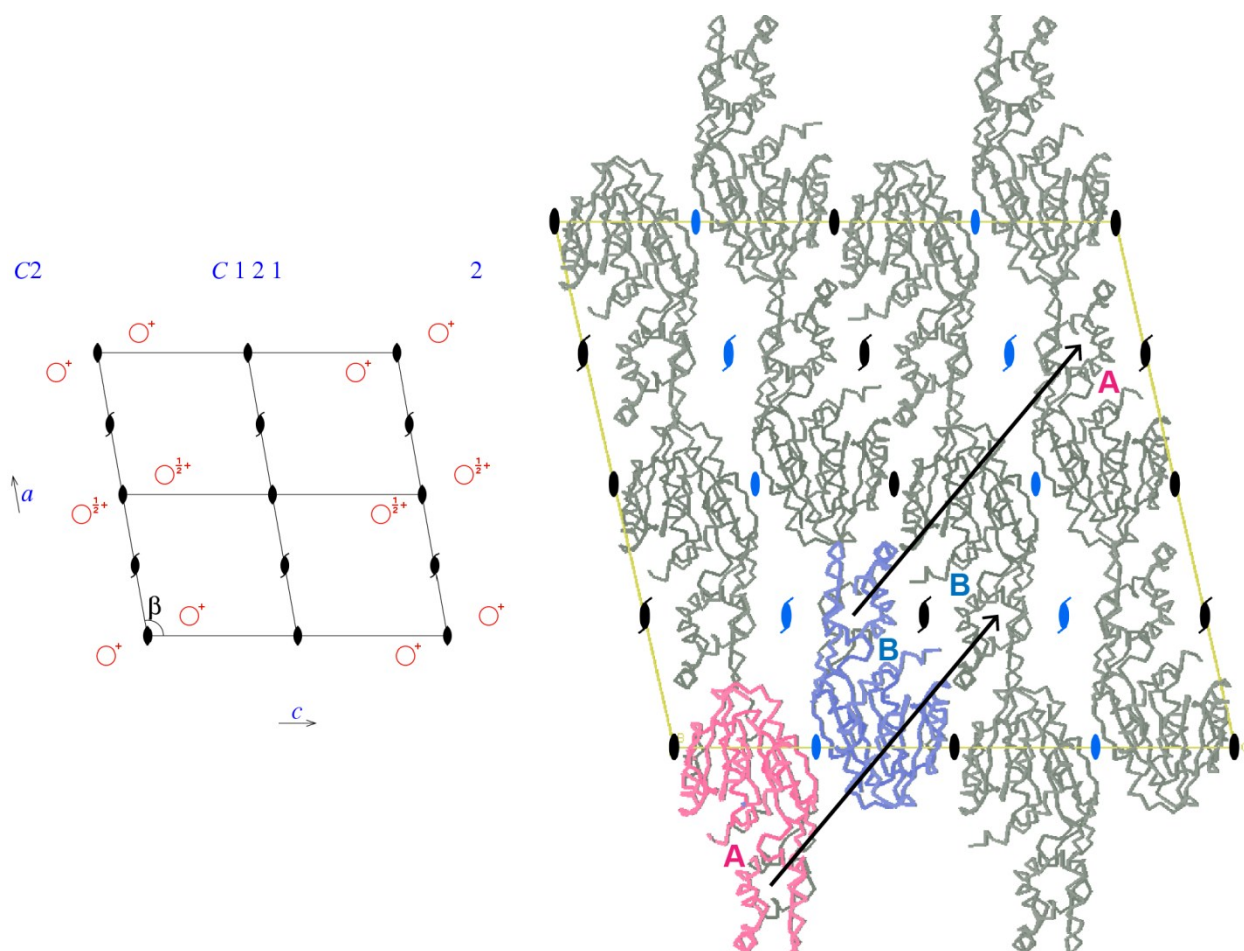

A space-group diagram for  $C2$  (left). The crystallographic symmetry operators are shown in black. Notice in the OxaG unit cell (right) a parallel twofold (colored blue) relates the two subunits of the asymmetric unit. As a result, subunits A and B are also related by pseudotranslational symmetry (black arrows).

Figure S3.

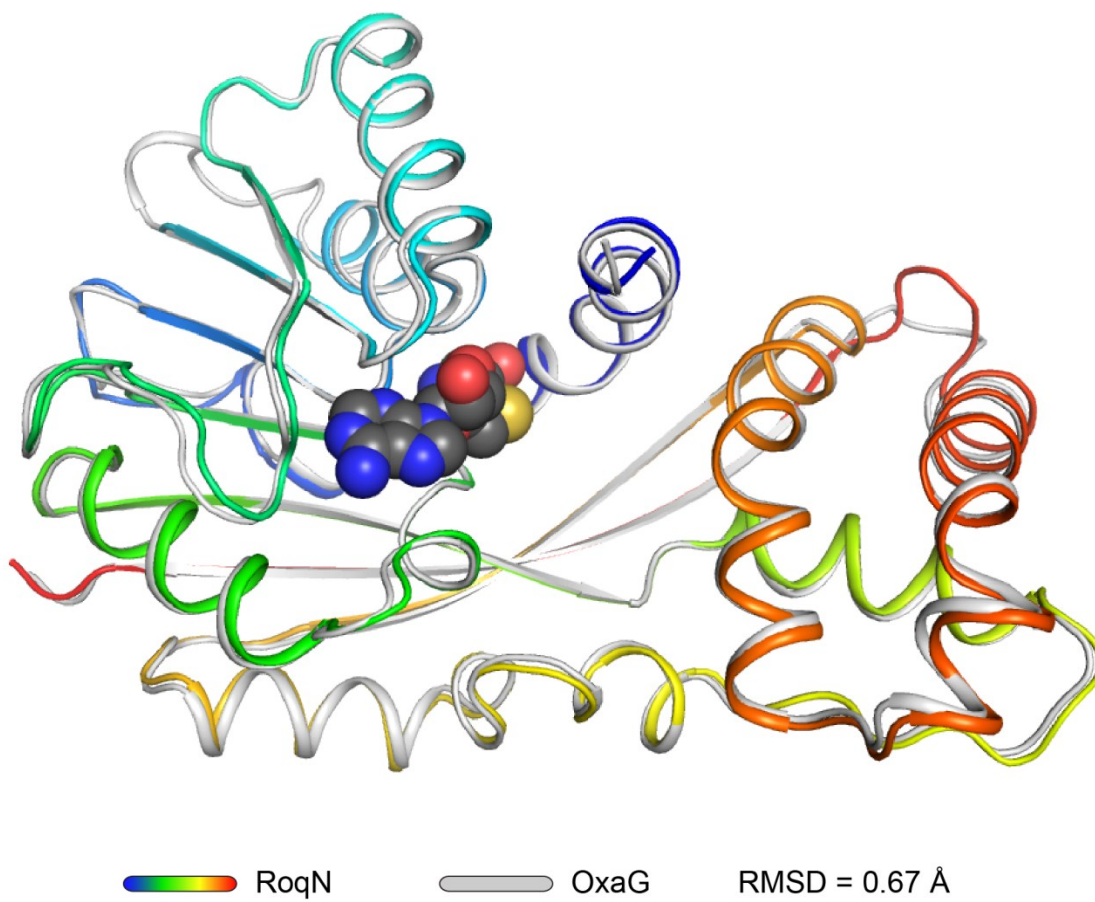

Figure S4.

A

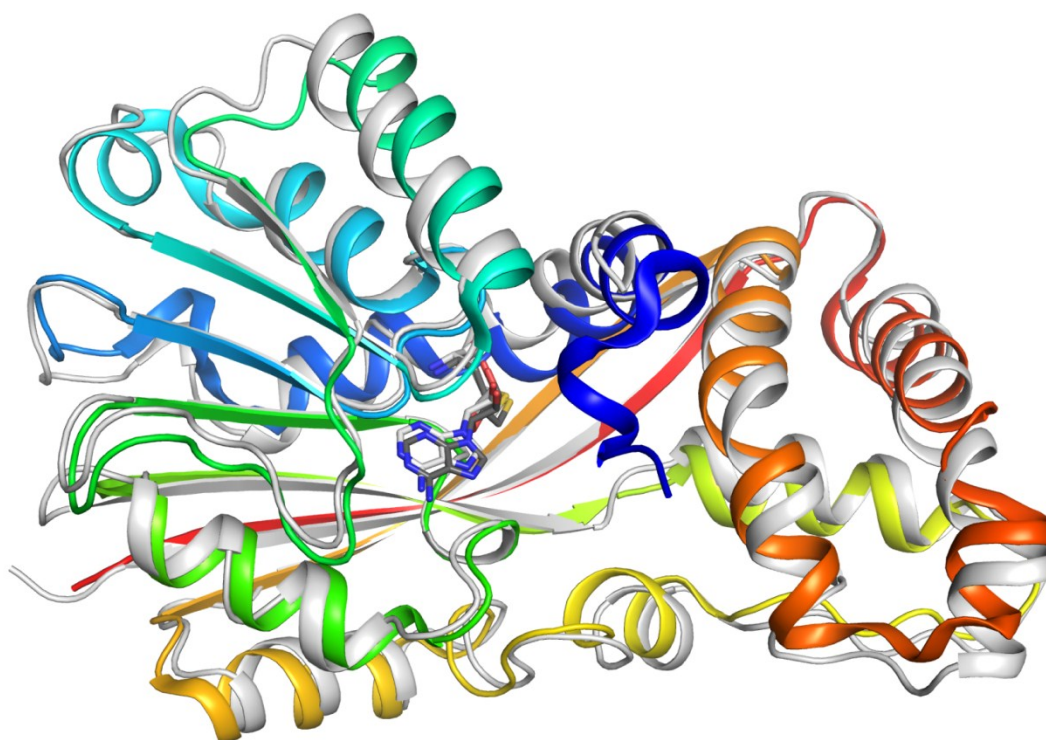

B

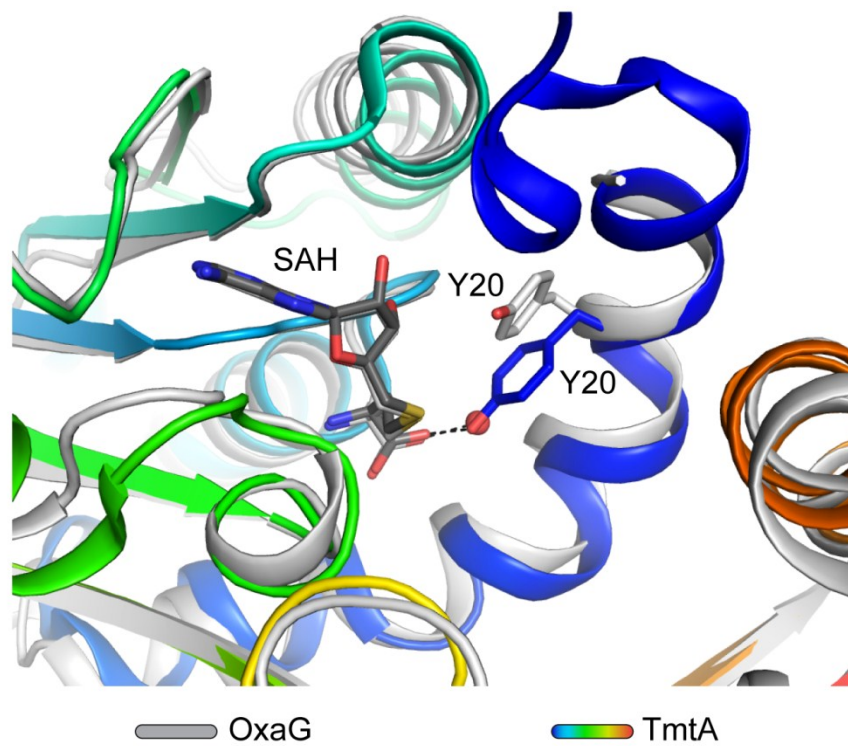

Figure S5.

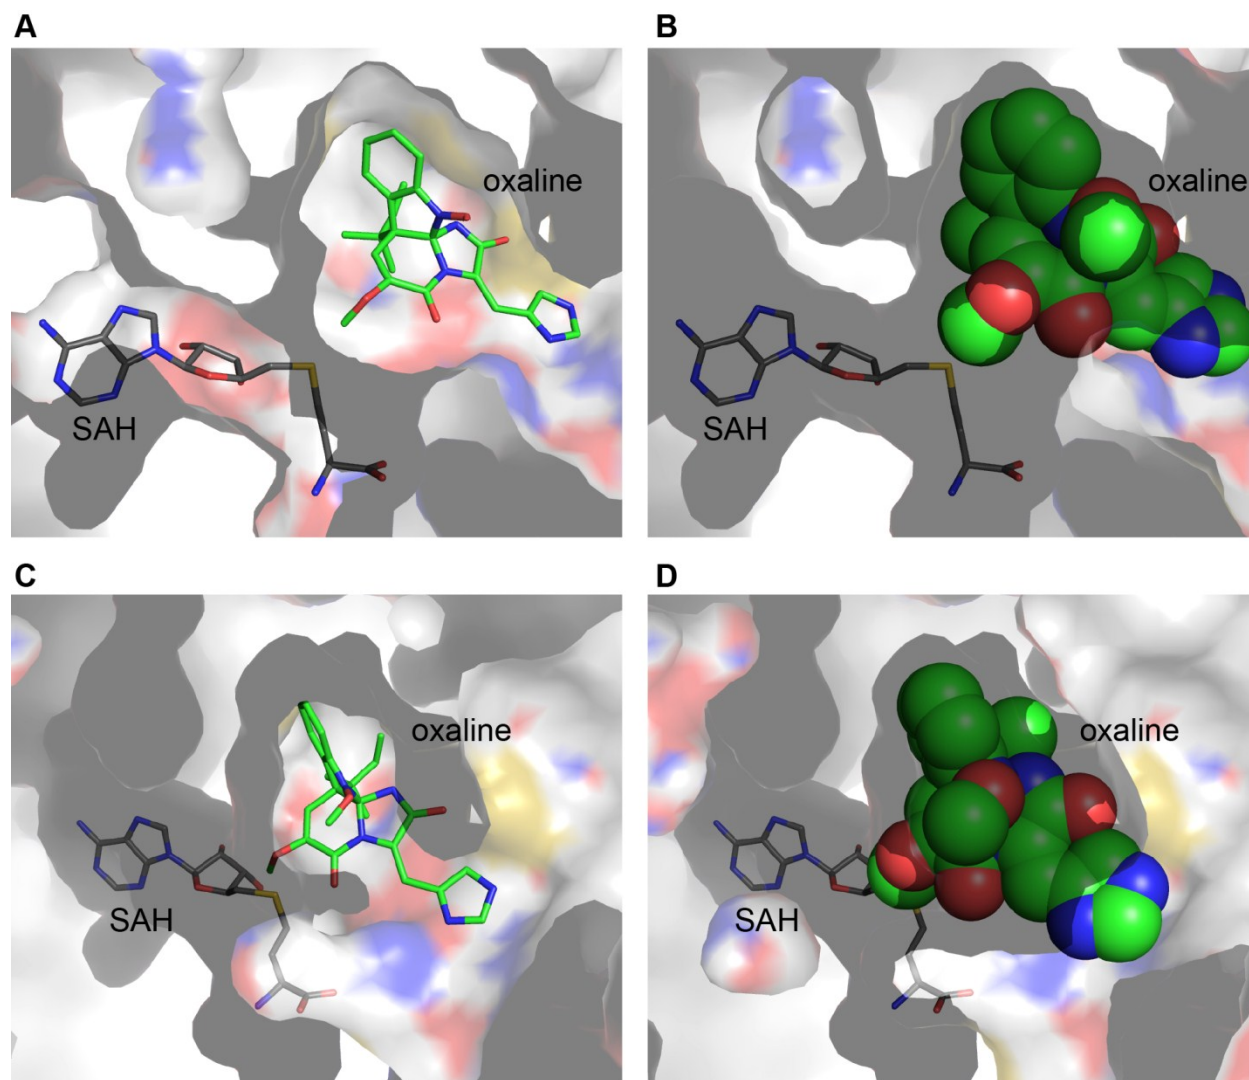

**Table S1.**

|                   |                                                                        |
|-------------------|------------------------------------------------------------------------|
| <i>oxaC_for</i>   | 5'- gagaatctctactccaaggcgctagcATGACATTTTCAAACGCTGATGCGC -3'            |
| <i>oxaC_rev</i>   | 5'- ggctttgtagcagccggatctcagTTATTTCAACCTGGCCTCGATGATGCC -3'            |
| <i>oxaG_for</i>   | 5'- gagaatctctactccaaggcgctagcATGACCCGCGCCACCAACTTTAC -3'              |
| <i>oxaG_rev</i>   | 5'- ggctttgtagcagccggatctcagTCACTTCTCCTTCTCTCCCTTGGCAAATAC -3'         |
| <i>roqN_for</i>   | 5'- ctgagaatctctactccaaggcGCTAGCATGACTCGCGCCACCAACTTTACCG -3'          |
| <i>roqN_rev</i>   | 5'- cctttcgggctttgtagcagccggatcCTAAGATCCCTTCTGACCAGTTGC -3'            |
| <i>oxaG_Y20F</i>  | 5' - GCAAGGGCATCCTGGAGACGTTTATGATCGCCGAGAA<br>GATTACGCGATATTTC -3'     |
| <i>oxaG_Y20A</i>  | 5'- GCAAGGGCATCCTGGAGACGGCGATGATCGCCGAGAAGA<br>TTACGCGATATTTC -3'      |
| <i>oxaC_D314A</i> | 5'- GATTTACTACTTCCGCCGCGTCTTTCACGCGTGGCCT<br>GATTTGCCTGAAGGTAAAAAG -3' |



**Table 2. NMR SPECTRA**

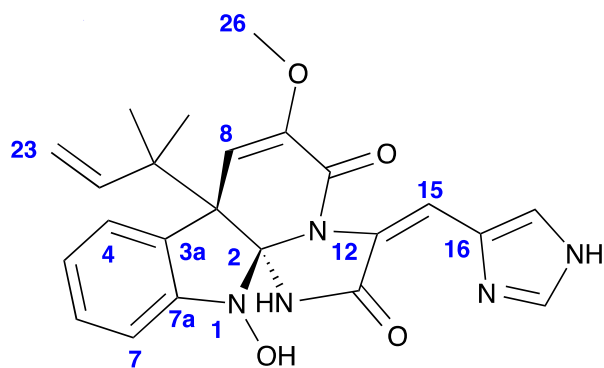

| Position    | Carbon | Hydrogen <i>J</i> Hz             | HMBC correlations  |
|-------------|--------|----------------------------------|--------------------|
| 2           | 103.10 |                                  |                    |
| 3           | 54.37  |                                  |                    |
| 3a          | 127.53 |                                  |                    |
| 4           | 125.84 | 7.63 (d, <i>J</i> = 7.7 Hz, 1H)  | C3, C6, C7a        |
| 5           | 123.77 | 7.04 (t, <i>J</i> = 7.6 Hz, 1H)  | C3a, C7            |
| 6           | 129.49 | 7.26 (t, <i>J</i> = 7.7 Hz, 1H)  | C4, C7a            |
| 7           | 113.09 | 6.96 (d, <i>J</i> = 7.8 Hz, 1H)  | C3a, C5            |
| 7a          | 149.76 |                                  |                    |
| 8           | 109.46 | 5.35 (s, 1H)                     | C2, C3a, C9, C10   |
| 9           | 147.51 |                                  |                    |
| 10          | 159.83 |                                  |                    |
| 12          | 127.17 |                                  |                    |
| 13          | 165.74 |                                  |                    |
| 15          | 108.80 | 8.27 (s, 1H)                     | C13, C12,(C16) C20 |
| 16          | 127.10 |                                  |                    |
| 18          | 138.31 | 7.88 (s, 1H)                     |                    |
| 20          | 132.27 | 7.37 (s, 1H)                     |                    |
| 21          | 41.69  |                                  |                    |
| 22          | n.d    | 6.11 (s, 1H)                     |                    |
| 23a (Trans) | 113.85 | 5.08 (d, <i>J</i> = 17.0 hz, 1H) |                    |
| 23b (Cis)   | 113.85 | 5.02 (bs, 1H)                    |                    |
| 24          | n.d    | 1.29 (s, 3H)                     |                    |
| 25          | n.d    | 1.32 (s, 3H)                     |                    |
| 26          | 56.19  | 3.60 (s, 3H)                     | C8, C9, C10        |

**<sup>1</sup>H NMR spectrum of glandicoline C in MeOH-d<sub>4</sub> at 600 MHz**

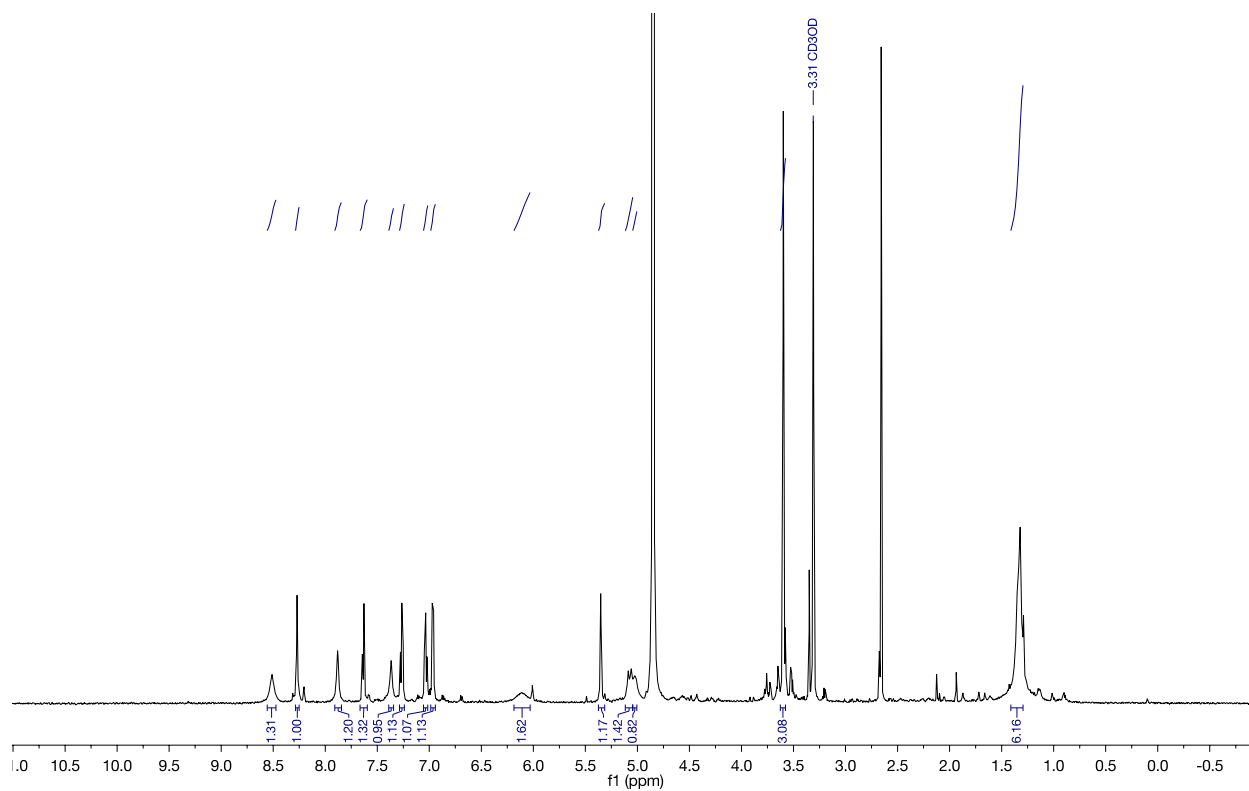

**$^{13}\text{C}$  NMR spectrum of glandicoline C in  $\text{MeOH-}d_4$  at 125 MHz**

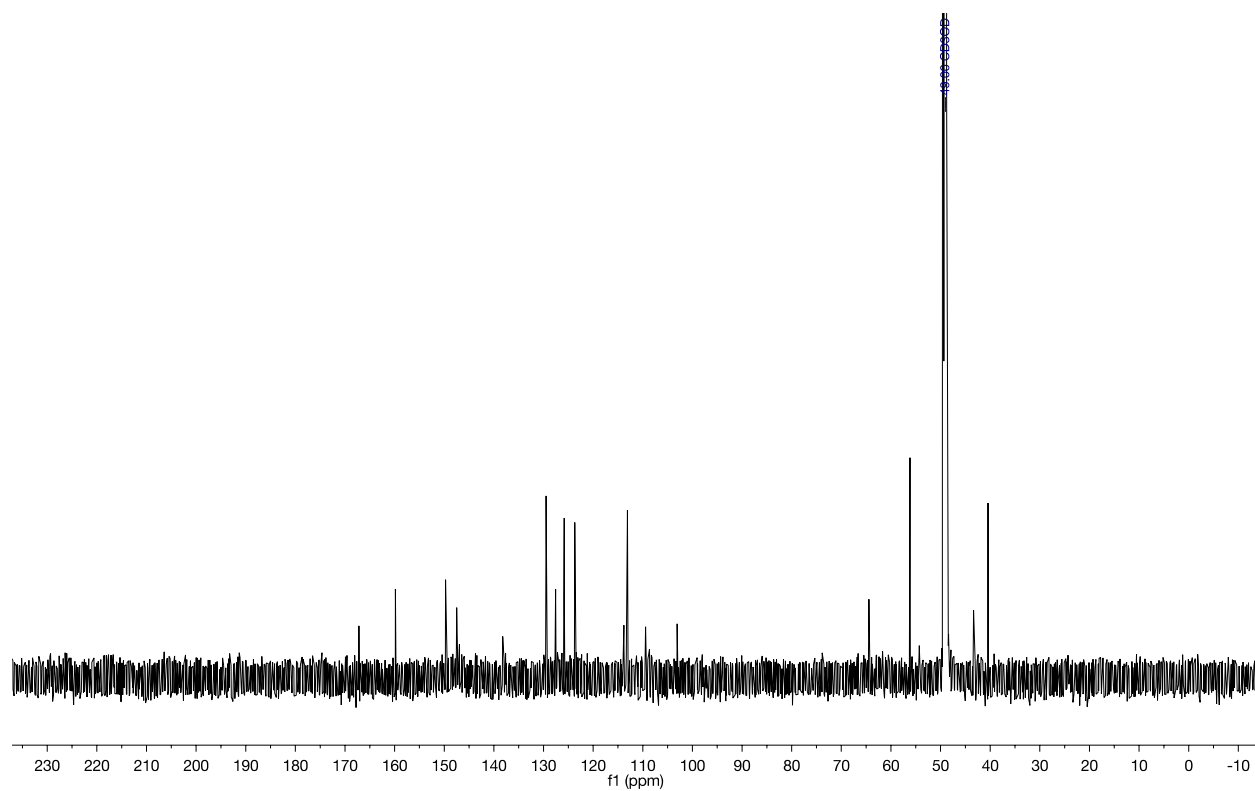

**COSY NMR spectrum of glandicoline C in MeOH-*d*<sub>4</sub>**

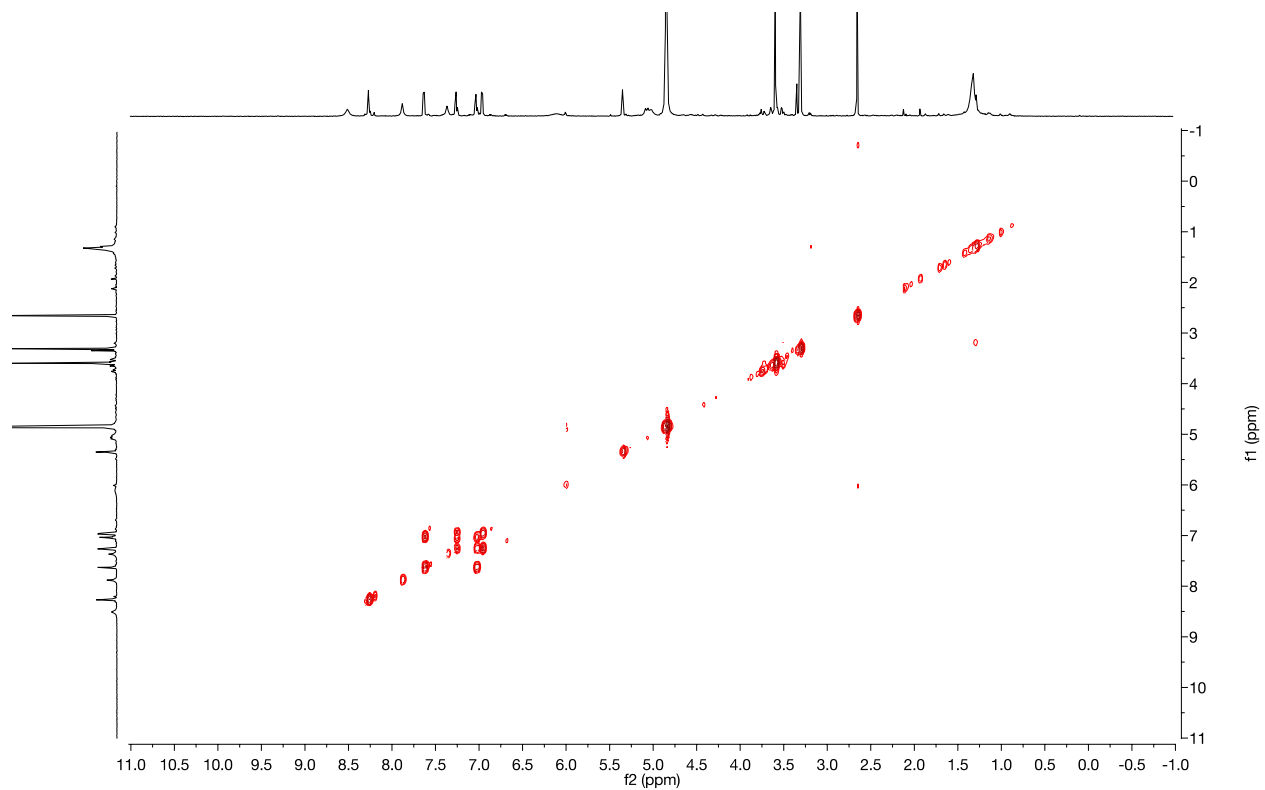

HSQC NMR spectrum of glandicoline C in MeOH- $d_4$

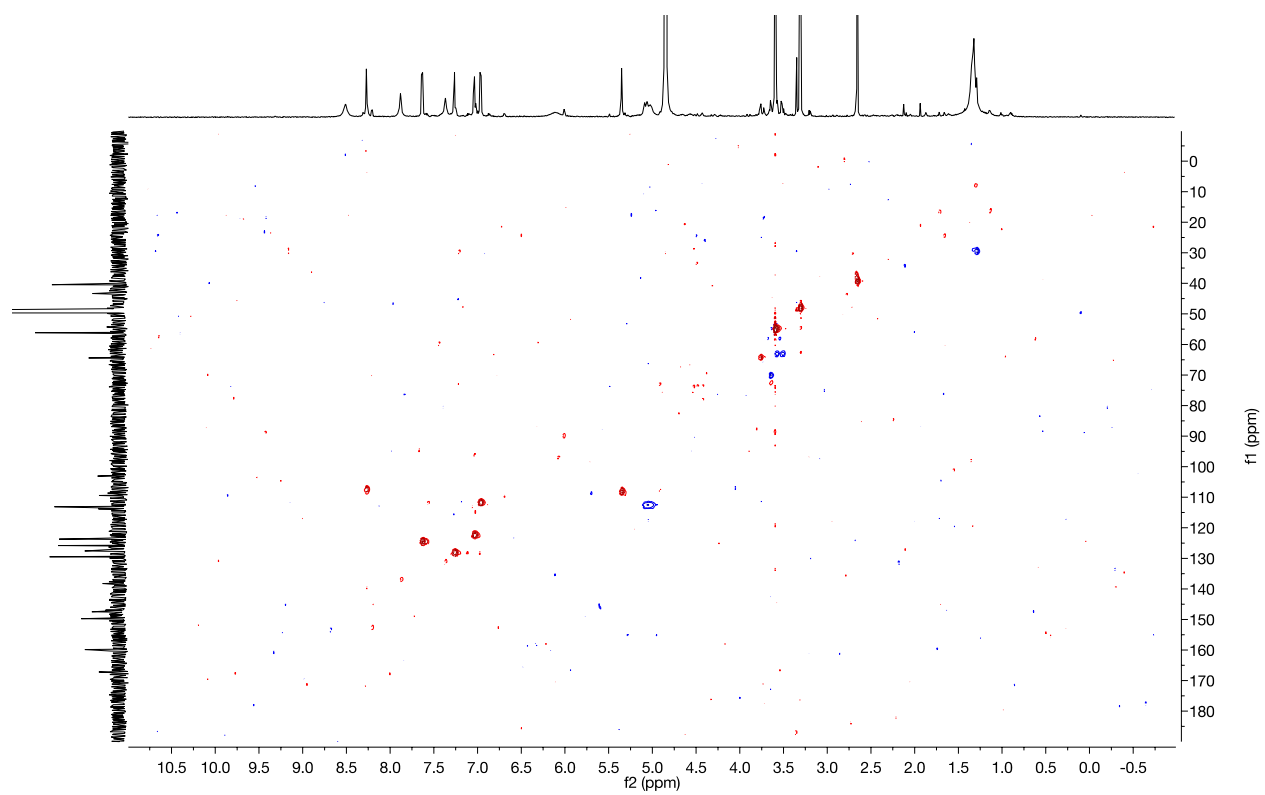

# HMBC spectrum of glandicoline C in MeOH-*d*<sub>4</sub>

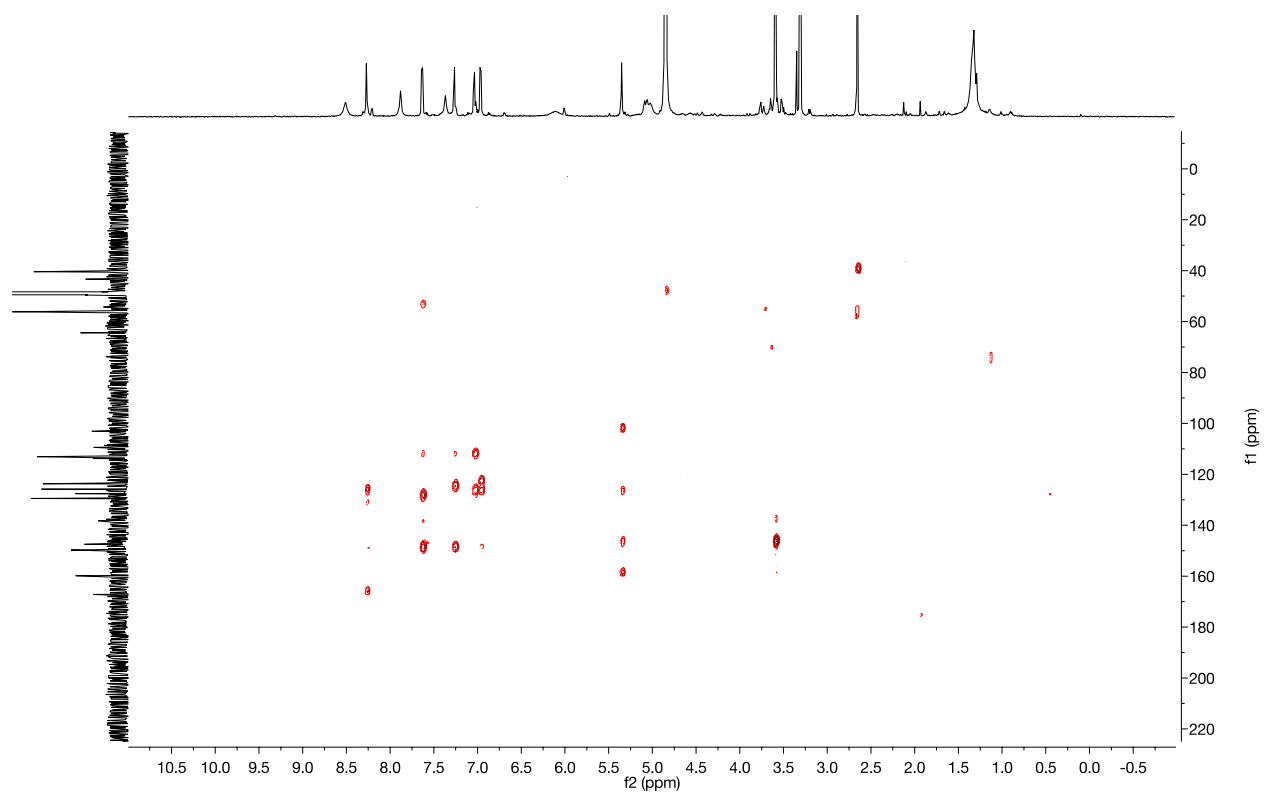

**<sup>1</sup>H NMR spectrum of glandicoline B in MeOH-d<sub>4</sub> at 600 MHz**

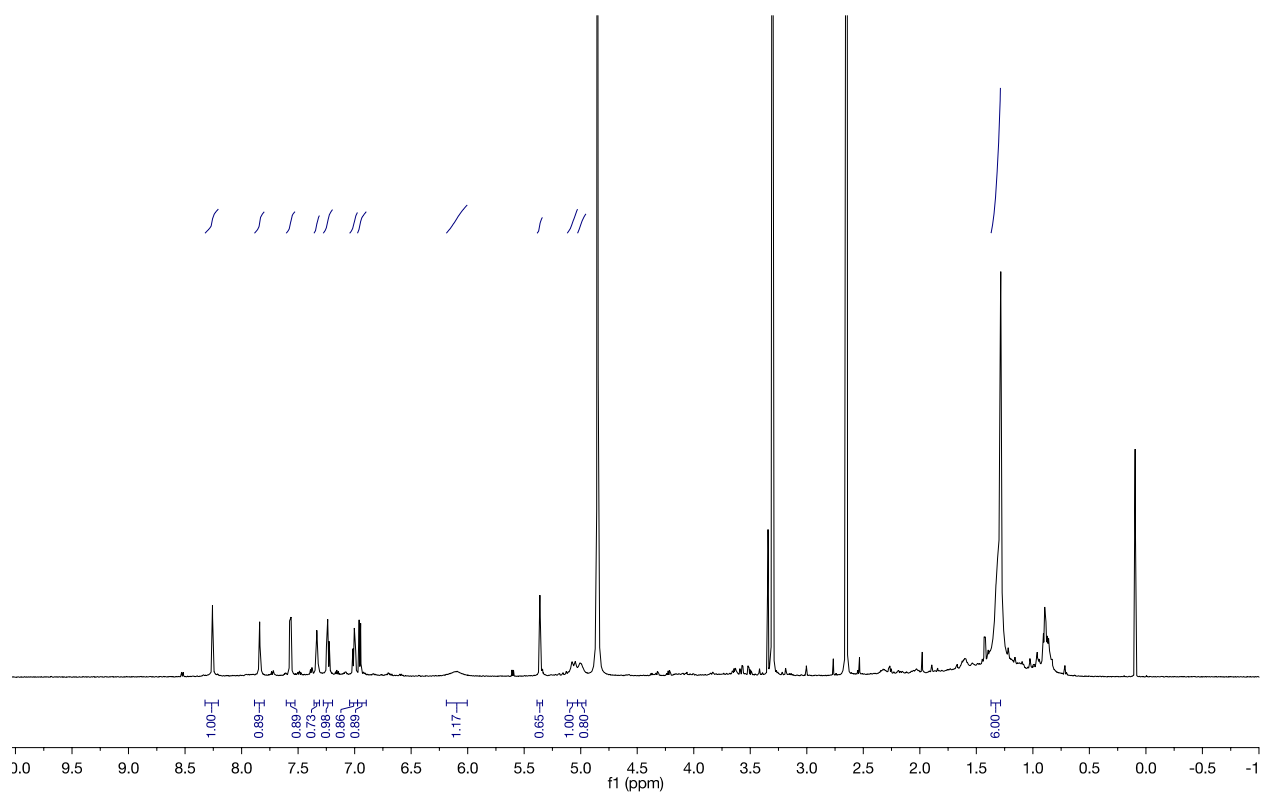

**$^{13}\text{C}$  NMR spectrum of glandicoline B in  $\text{MeOH-}d_4$  at 125 MHz**

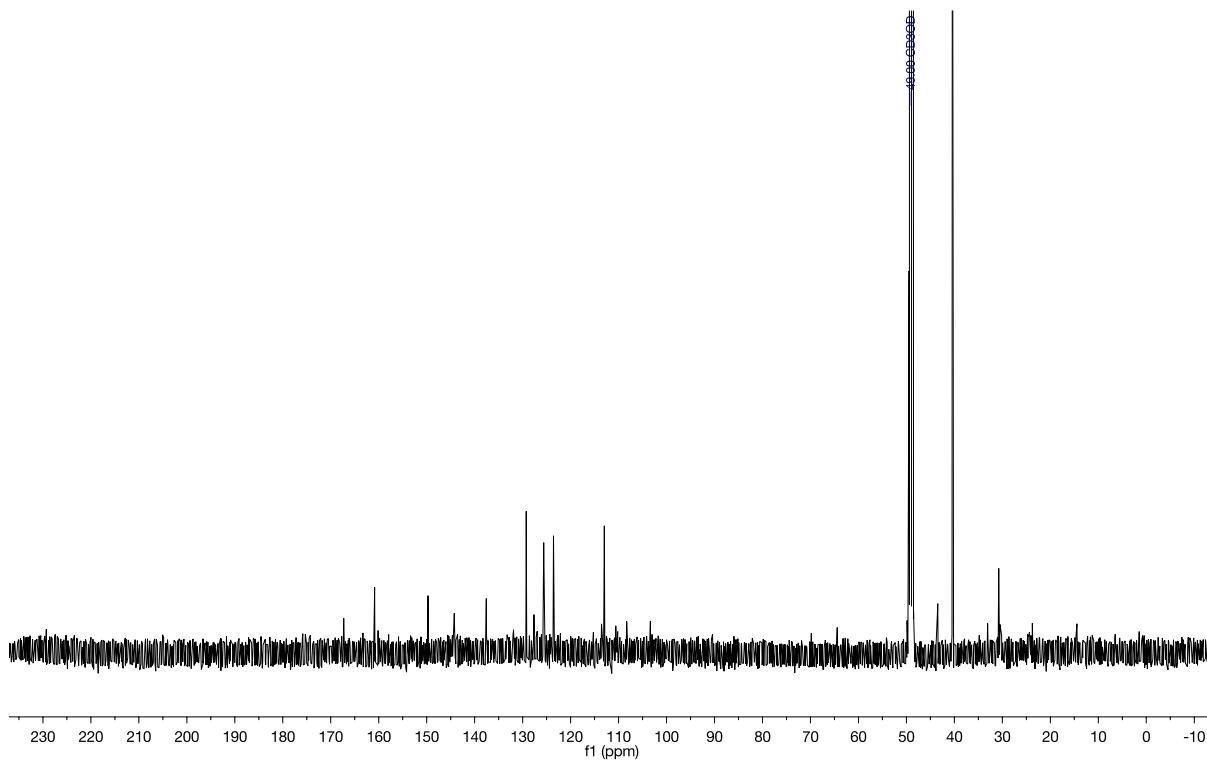



**COSY NMR spectrum of glandicoline B in MeOH- $d_4$**

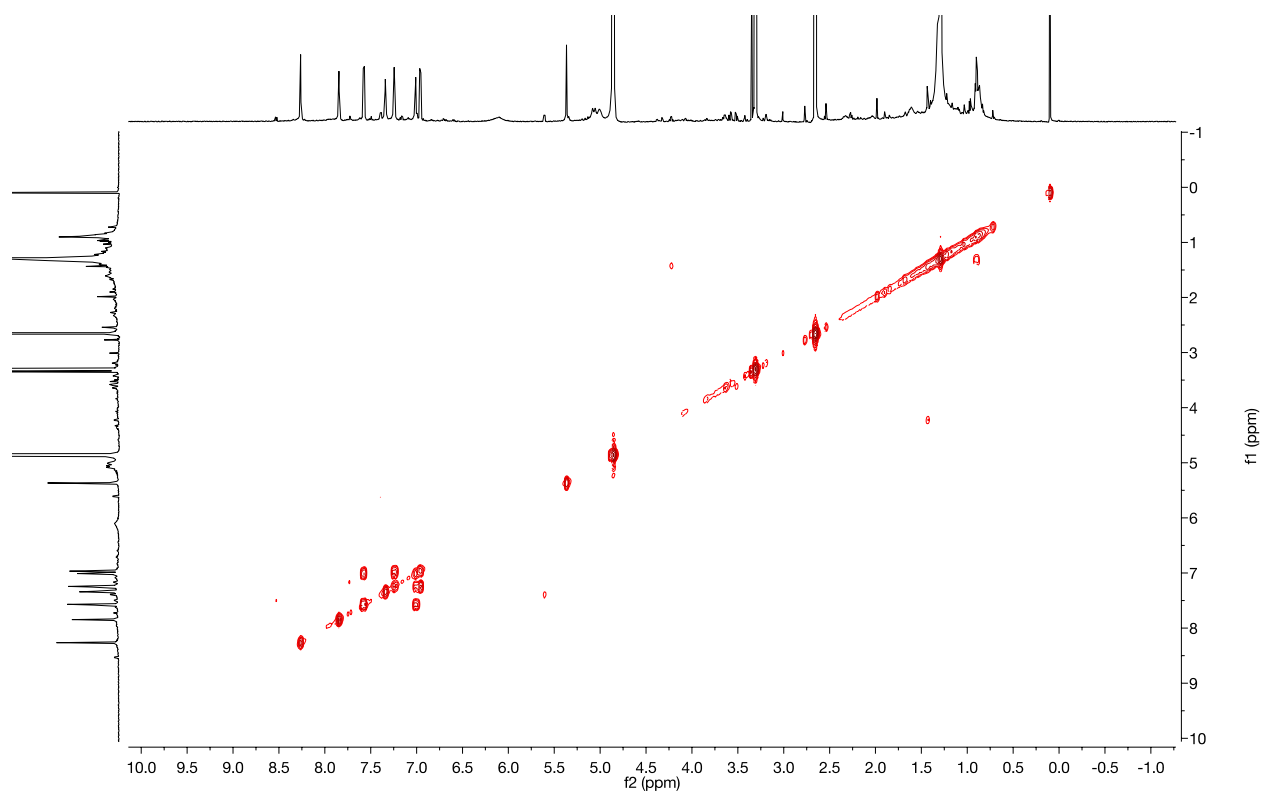

# HSQC NMR spectrum of glandicoline B in MeOH-*d*<sub>4</sub>

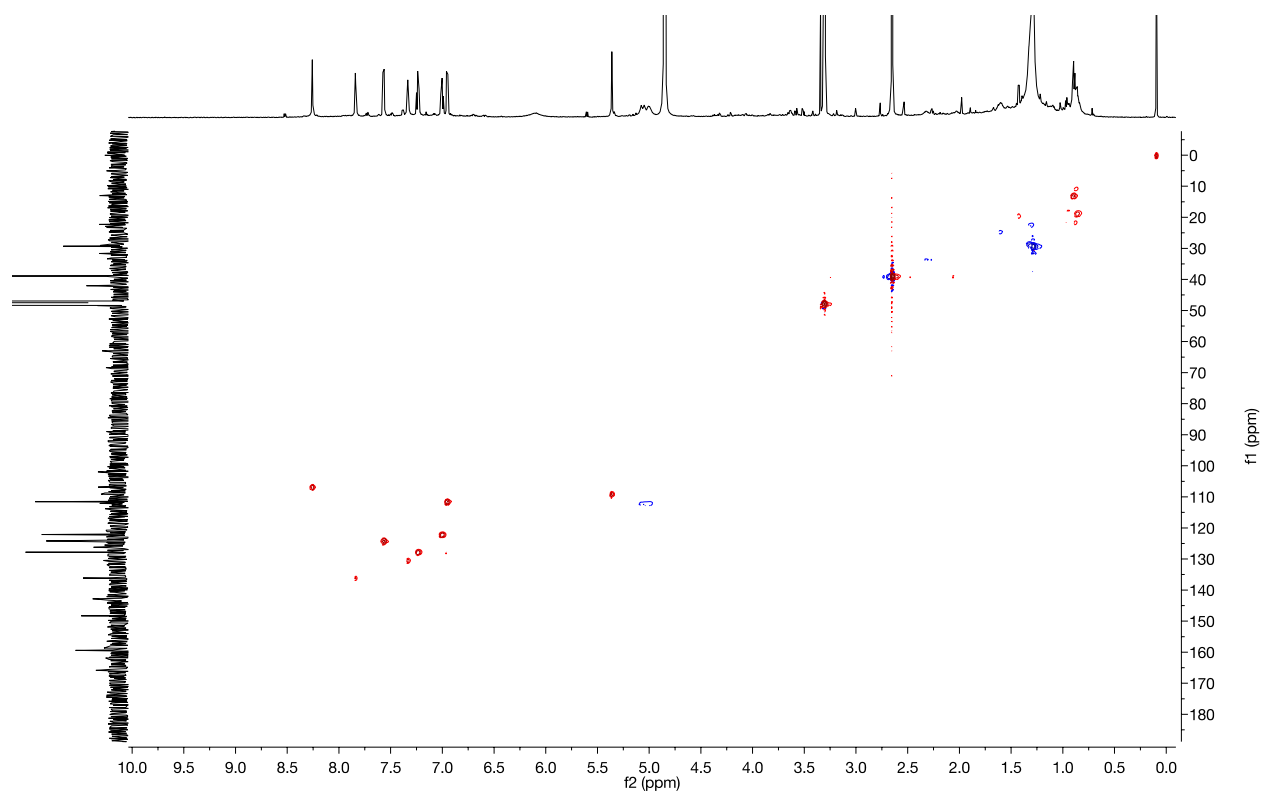

# HMBC spectrum of glandicoline B in MeOH-*d*<sub>4</sub>

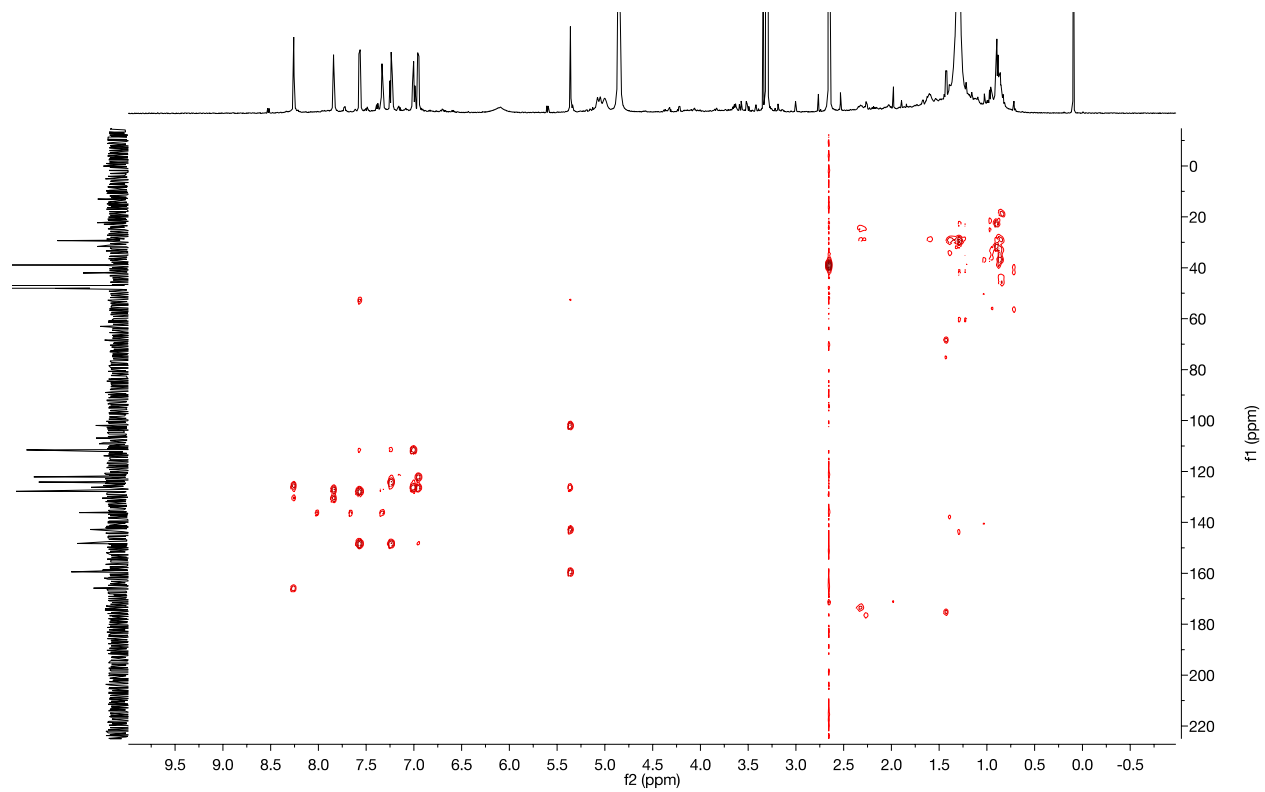

Supplement: NIHMS987055-supplement-ESI.pdf [file NIHMS987055-supplement-ESI.pdf]
